# Supplementary material for: Temporal Interleukin-1β Secretion from Primary Human Peripheral Blood Monocytes by P2X7-independent and P2X7-dependent Mechanisms
Source: PubMed Central journal article supplement — J Biol Chem. 2010 May 21;285(30):23147–58. doi: 10.1074/jbc.M109.072793 (PMC2906308; doi:10.1074/jbc.m109.072793), 2010-05-21

**Supplemental Figure 1: Annexin V binding to monocytes, measured by flow cytometry, is dependent upon P2X7 receptor activation but independent of IL-1 $\beta$  release.** PS exposure was assessed by flow cytometry for monocytes labelled with annexin V-PE, under the conditions shown. For each treatment forward-scatter against side-scatter dot plots are shown for all flow cytometric events (ungated) in upper panels, and corresponding forward-scatter against FL2 fluorescence channel dot plots are shown for all events (ungated) in lower panels. The corresponding histograms of annexin V staining for both treatments are shown centre-right. *A*, PS staining due to BzATP: monocytes were primed with buffer for 3 h followed by buffer or BzATP for 20 min or *B*, with LPS (1 ng/ml) for 3 h then stimulated with buffer or BzATP for 20 min. *C*, PS exposure inhibition by a P2X7 receptor antagonist: monocytes primed with buffer (control), *C*, or LPS (1 ng/ml), *D*, for 3 h in the presence of DMSO (vehicle control) or KN62, then stimulated with Buffer or BzATP for 20 min. The data shown is from a single donor (different from that shown in Fig. 6), representative of a total of 4 separate experiments from separate donors.

**Supplemental Figure 2: Annexin V binding to monocytes, measured by flow cytometry, is dependent upon P2X7 receptor activation but independent of IL-1 $\beta$  processing and release.** PS exposure was assessed by flow cytometry for monocytes labelled with annexin V-PE, under the conditions shown. For each treatment forward-scatter against side-scatter dot plots are shown for all flow cytometric events (ungated) in upper panels, and corresponding forward-scatter against FL2 fluorescence channel dot plots are shown for all events (ungated) in lower panels. The corresponding histograms of annexin V staining for both treatments are shown centre-right. The effect of caspase-1 inhibition on PS exposure: monocytes primed with buffer (control), *A*, or LPS (1 ng/ml), *B*, for 3 h in the presence of DMSO (vehicle control) or YVAD caspase-1 inhibitor, then stimulated with Buffer or BzATP for 20 min. The effect of CL075 on PS exposure at 3 h in the presence of DMSO (vehicle control), *D*, or KN62, *C*. Monocytes treated with CL075 were subsequently stimulated with buffer or BzATP for 20 minutes in the absence or presence of KN62. The data shown are from a single donor for treatments in parts A and B, representative of a total of 3 separate experiments from separate donors. Data shown in parts C and D are from another single donor, representative of a total of 4 separate experiments from separate donors (each different from that shown in Fig. 6).

Sup. Fig. 1

**C: Buffer + BzATP ± KN62**

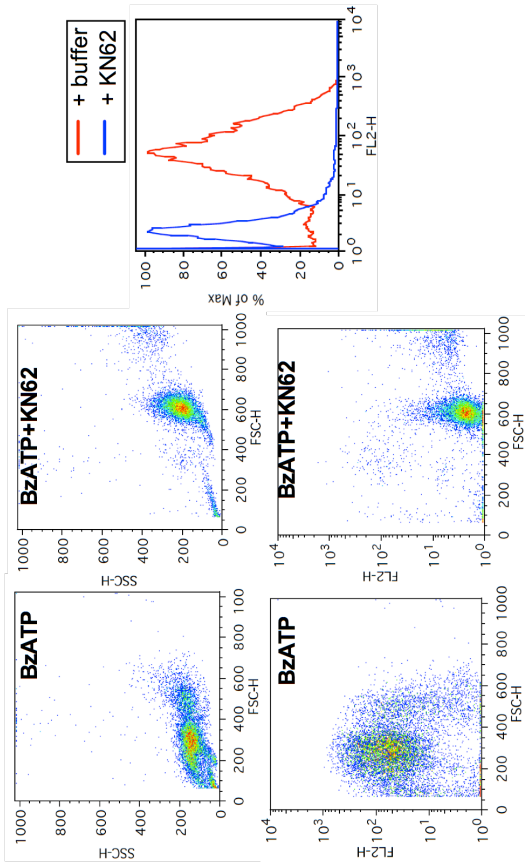

**D: LPS + BzATP ± KN62**

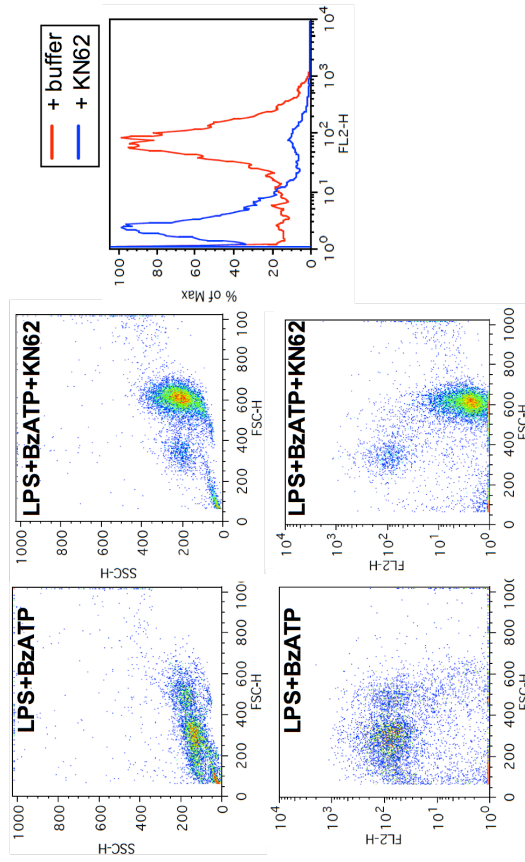

**A: Buffer ± BzATP**

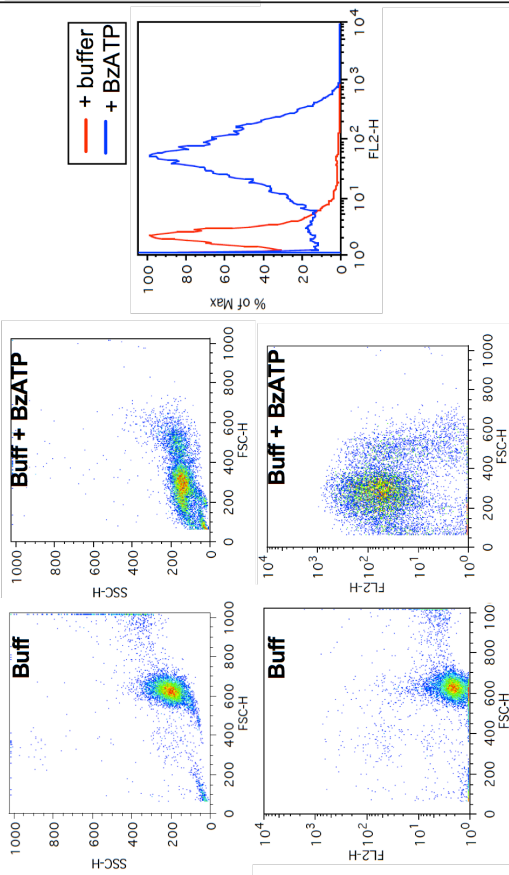

**B: LPS ± BzATP**

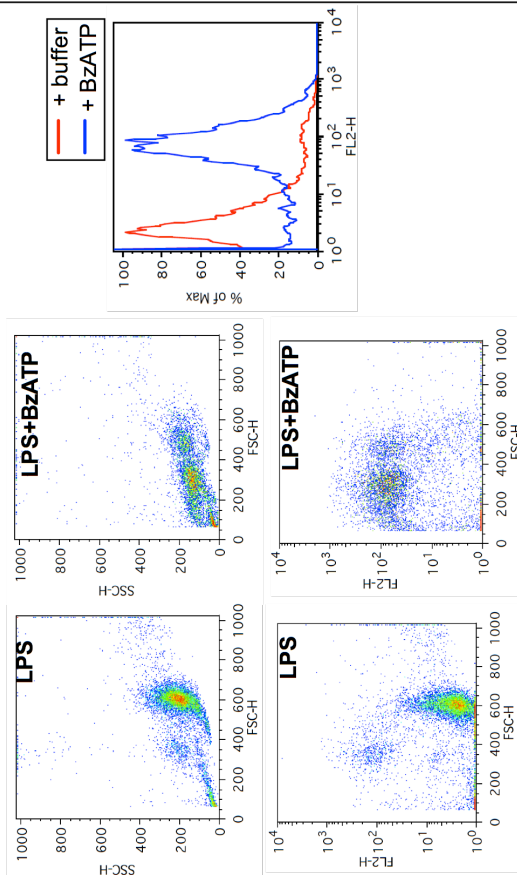

Sup. Fig. 2

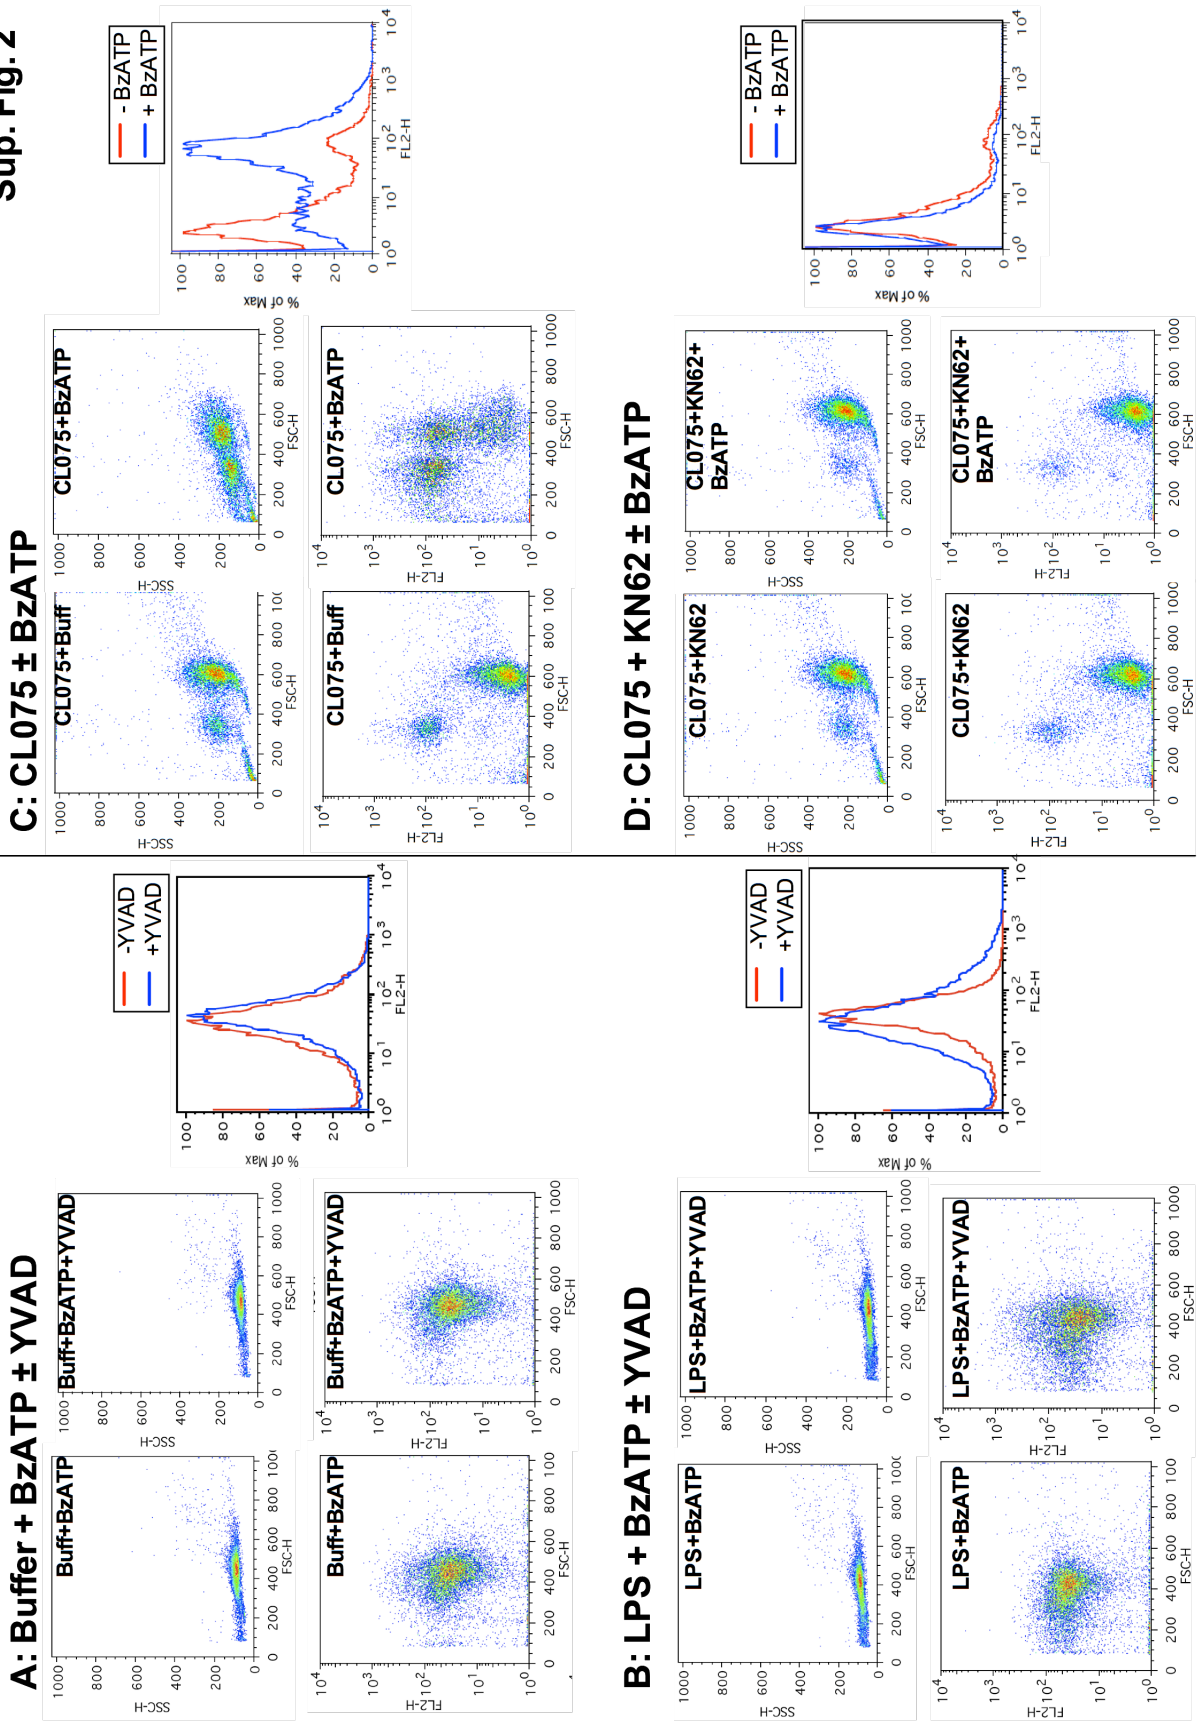

Supplement: supp_M109.072793_jbc.M109.072793-1.pdf [file supp_M109.072793_jbc.M109.072793-1.pdf]
